# Supplementary material for: Optimization of a gas chromatographic unit for measuring BVOCs in ambient air
Source: Copernicus journal article supplement (doi:10.5194/amt-2019-224), 2019-07-11
Supplement: Supplementary file 1 [file amt-2019-224-supplement.pdf]

## Supplementary

### S1 Composition of NPL calibration standard mixture

Table S1 : Composition of NPL calibration standard mixture (D09 0523, June 2014)

| Compounds        | nmol/mol | Expanded uncertainty | Compounds              | nmol/mol | Expanded uncertainty |
|------------------|----------|----------------------|------------------------|----------|----------------------|
| ethane           | 4.22     | 0.08                 | isoprene               | 4.19     | 0.09                 |
| ethene           | 4.06     | 0.08                 | heptane                | 4.18     | 0.08                 |
| propane          | 4.25     | 0.09                 | benzene                | 4.00     | 0.08                 |
| propene          | 4.18     | 0.08                 | 2,2,4-trimethylpentane | 4.15     | 0.08                 |
| 2-methylpropane  | 4.37     | 0.11                 | octane                 | 4.2      | 0.08                 |
| butane           | 4.14     | 0.08                 | toluene                | 3.99     | 0.1                  |
| ethyne           | 4.3      | 0.21                 | ethylbenzene           | 3.99     | 0.1                  |
| trans-but-2-ene  | 4.14     | 0.08                 | m-xylene               | 4.04     | 0.11                 |
| but-1-ene        | 4.14     | 0.08                 | p-xylene               | 3.98     | 0.1                  |
| cis-but-2-ene    | 4.19     | 0.08                 | o-xylene               | 3.99     | 0.1                  |
| 2-methylbutane   | 4.21     | 0.08                 | 1,3,5-trimethylbenzene | 4.09     | 0.11                 |
| pentane          | 4.21     | 0.08                 | 1,2,4-trimethylbenzene | 4.03     | 0.11                 |
| 1,3-butadiene    | 4.13     | 0.08                 | 1,2,3-trimethylbenzene | 4.16     | 0.11                 |
| trans-pent-2-ene | 4.13     | 0.08                 | $\alpha$ -pinene       | 3.88     | 0.08                 |
| pent-1-ene       | 4.14     | 0.08                 | $\beta$ -pinene        | 3.95     | 0.2                  |
| 2-methylpentane  | 4.23     | 0.08                 | limonene               | 3.99     | 0.12                 |
| hexane           | 4.15     | 0.08                 |                        |          |                      |

## S2 MnO<sub>2</sub> and thiosulfate scrubber BVOCs test results

As seen on Figure S1, the monoterpenes were unaffected by the scrubber (with a relative deviation of less than  $\pm 10\%$ ) but for oxygenated compounds, a loss of signal remained even after nine hours: e.g. nopinone (12%), citral (23%), linalool (38%) and menthol (45%).

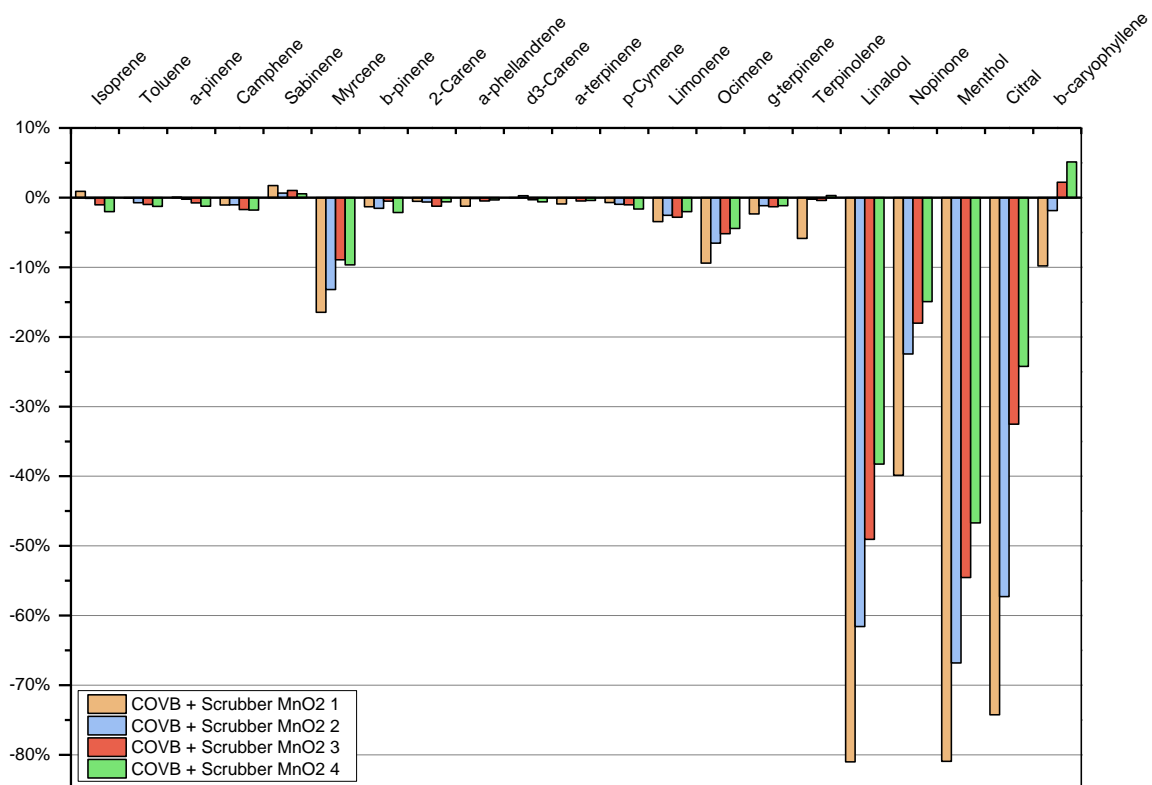

5

**Figure S1 : Relative deviation to direct measurement of VOC concentrations when sampling with a MnO<sub>2</sub> scrubber. Each bar represents one measurement.**

### S3 Uncertainties repartition in field campaign conditions

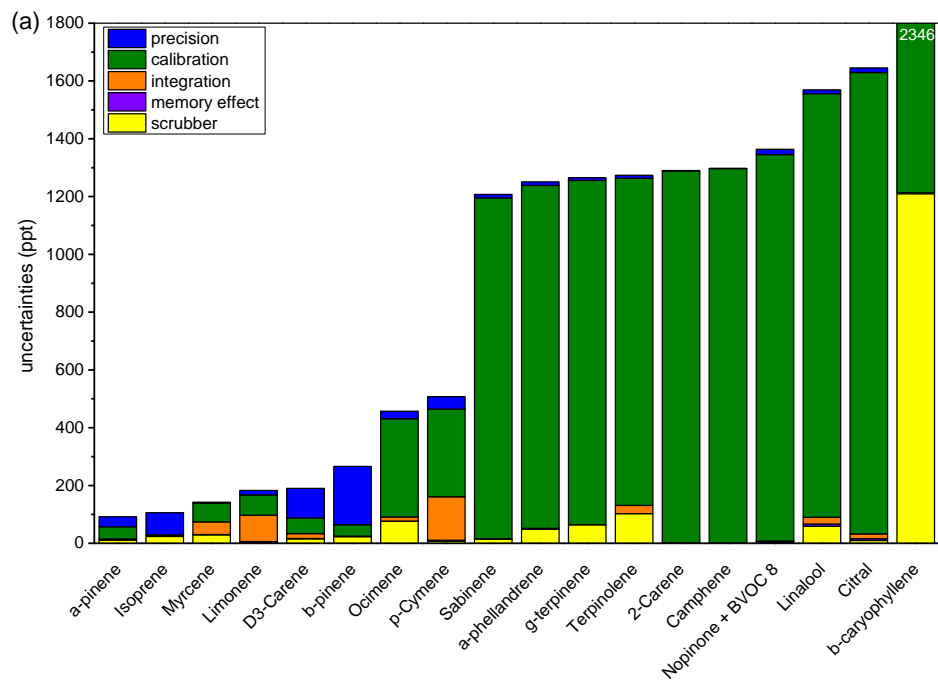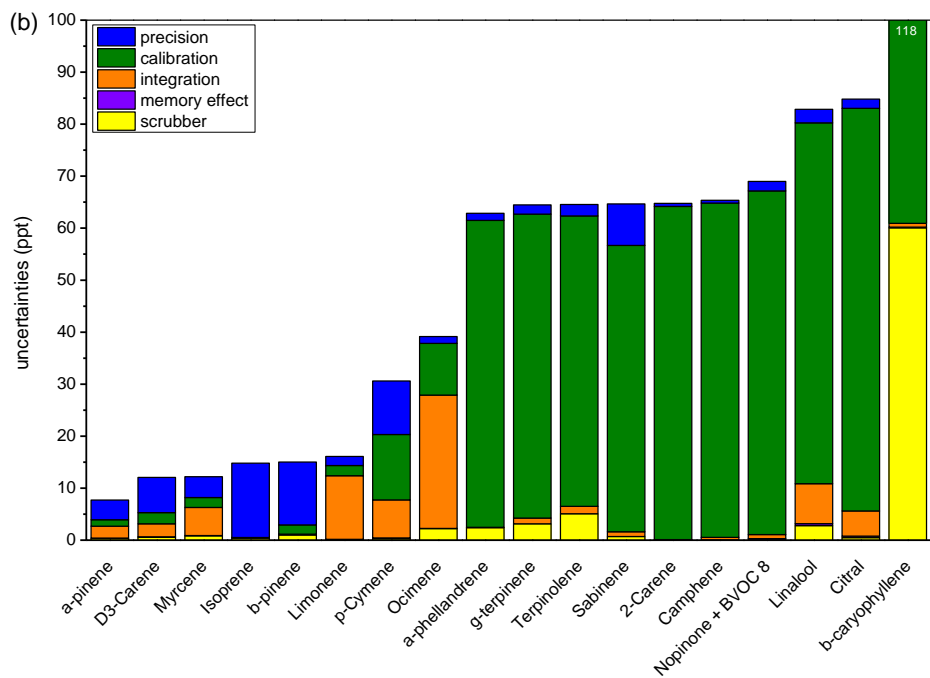

5 **Figure S2 : Uncertainty repartition for the five terms considered (precision, calibration, integration, memory effect and scrubber) at (a) 2 ppt and (b) 100 ppt with field campaign analytical parameters.**

## S4 Concentrations time series for the 20 BVOCs measured during the LANDEX-episode 1 field campaign in summer 2017

5 BVOC time series of  $\beta$ -pinene,  $\alpha$ -pinene, limonene, myrcene,  $\Delta^3$ -carene, linalool, isoprene and  $\beta$ -caryophyllene are presented on the main publication. The other compounds are presented on Figure S2.

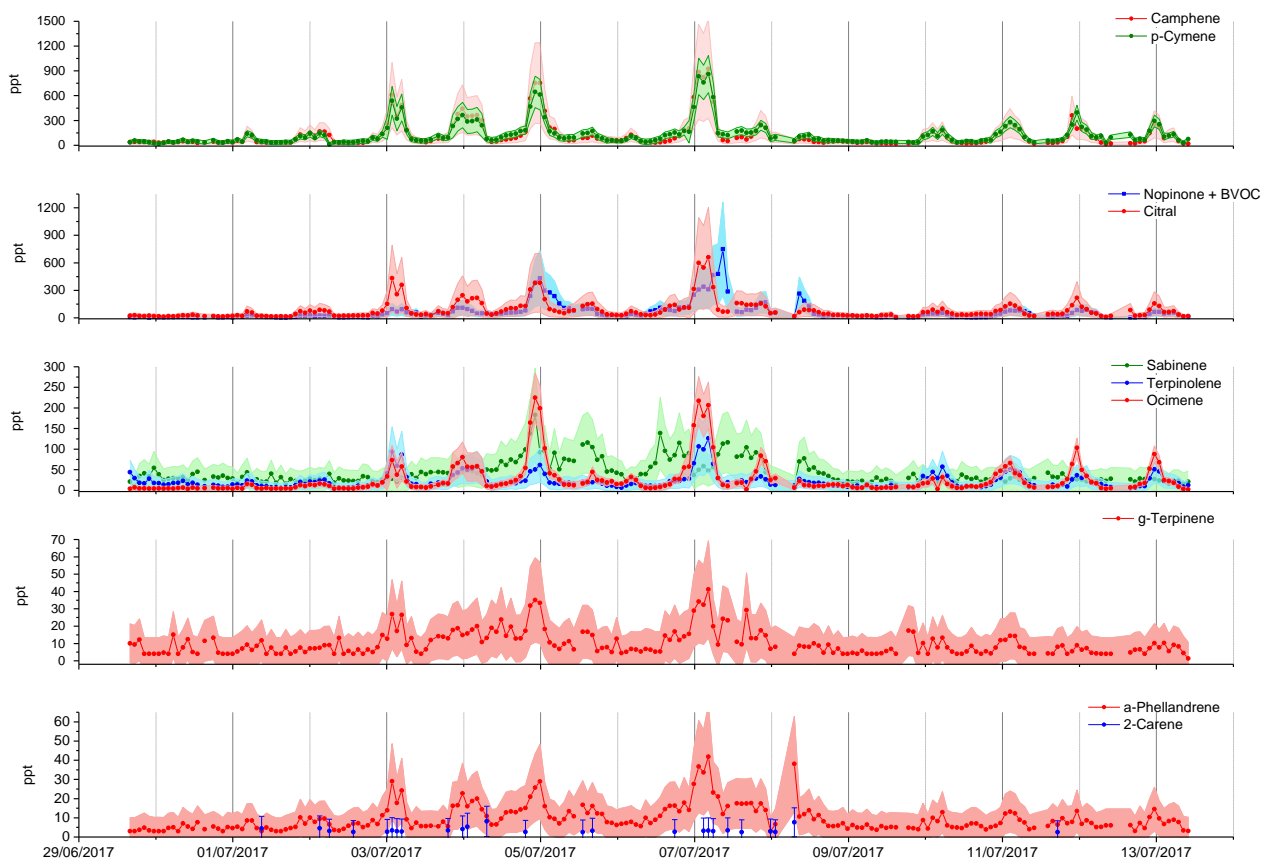

10 **Figure S3 : Times series of BVOC concentrations with their associated uncertainties ( $k=2$ ) for a selection of compounds observed during the LANDEX field campaign (camphene, p-cymene, nopinone, citral, sabinene, terpinolene, ocimene,  $\gamma$ -terpinene,  $\alpha$ -terpinene,  $\alpha$ -phellandrene, 2-carene).**
